# Supplementary material for: Robust soy protein films obtained by slight chemical modification of polypeptide chains
Source: Royal Society of Chemistry journal article supplement (doi:10.1039/c3py00557g), 2013-01-01
Supplement: c3py00557g.pdf [file c3py00557g.pdf]

## Supporting information

### Robust soy protein films obtained by slight chemical modification on polypeptide chains

Li Ma, Yuhong Yang, Jinrong Yao\*, Zhengzhong Shao and Xin Chen\*

State Key Laboratory of Molecular Engineering of Polymers, Department of Macromolecular Science, Laboratory of Advanced Materials, Fudan University, 220 Handan Road, Shanghai, 200433, People's Republic of China

E-mail: chenx@fudan.edu.cn (X. C.), yaoyaojr@fudan.edu.cn (J. Y.)

Fax: +86-21-5163-0300; Tel: +86-21-6564-2866

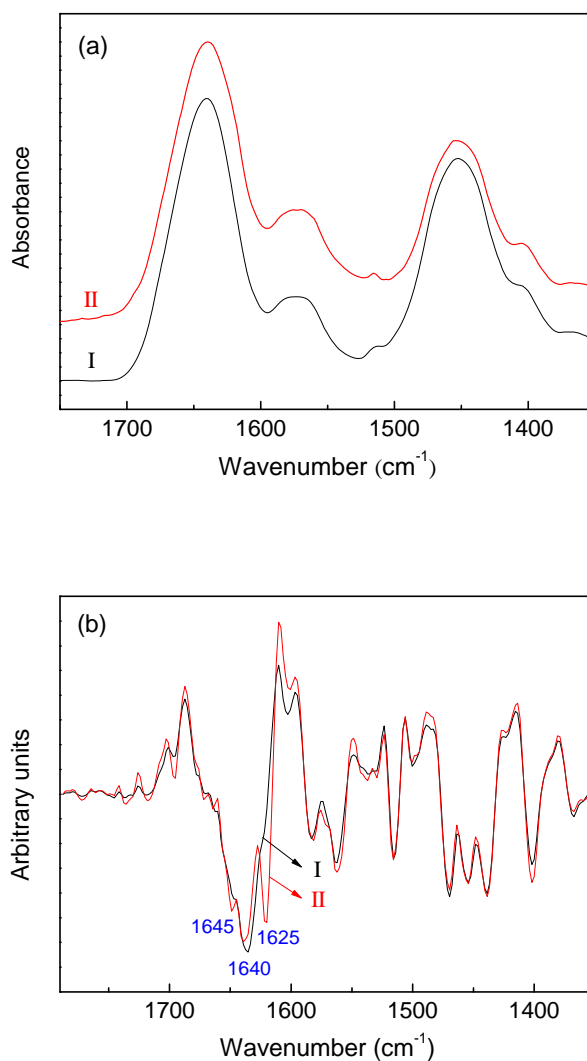

**Fig. S1** Original FTIR spectra (a) and the second derivative spectra (b) of SPI and SP100 solutions.

(I) SPI solution; (II) SP100 solution.

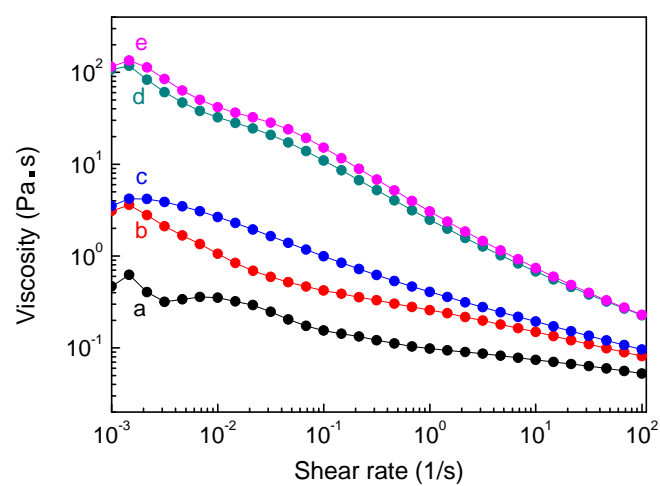

**Fig. S2** Rheological behavior of SPI and the modified SPn solutions at 25°C. (a) SPI, (b) SP100, (c) SP200, (d) SP400, (e) SP600. Sample concentration: 100 mg/mL.
